# Supplementary material for: Factors affecting in vitro regeneration in the model tree Populus trichocarpa: II. Heritability estimates, correlations among explant types, and genetic interactions with treatments among wild genotypes
Source: Springer Nature journal article supplement (doi:10.1007/s11627-022-10302-8), 2022-11-25
Supplement: MOESM1 [file 11627_2022_10302_MOESM1_ESM.zip]

## Sheet: Sheet1
Table S3. Broad-sense heritabilities from different experimental conditions, showing statistical significance.
Experiment ID	Working ID	Treatment	Proportion of explants with callus			Callus size			Proportion of explants with shoot			Shoot number			Proportion of explants with root			Root number
			Leaf	Petiole	Stem	Leaf	Petiole	Stem	Leaf	Petiole	Stem	Leaf	Petiole	Stem	Leaf	Petiole	Stem	Leaf	Petiole	Stem
E1 (in vivo)	1	1 (indirect)	0.8	0.87					0.63*	0.7*					0.74*	0.52*
		2 (direct)	0.41	0.69*					0.63*	0.82*					NA	NA
E3 (in vitro)	4	39 (BM11)	0.37	0.26	0.43	0.36	0.25	0.6*	0.78*	0.46	0.85*	0.33	0.57*	0.79*	0.74*	0.04	0.61*	0.78*	0.05	0.34
		40 (BM19)	0.02	0.66*	0.72*	0.06	0.6*	0.73*	0.49	0.78*	0.38	0.4	0.63*	0.66*	0.96*	0.81*	0.12	0.75*	0.74*	0.12
		41 (BM23)	0	0.74*	0.6*	0	0.73*	0.51	0.23	0.49	0.56*	0.01	0.24	0.47	0.56*	0.31	0.76*	0.62*	0.25	0.72*
		42 (BM24)	0.49	0.84*	0.66*	0.45	0.84*	0.63*	0.72*	0.88*	0.82*	0.23	0.71*	0.46	0.56*	0.29	0.4	0.68*	0.29	0.29
		43 (BM28)	0.27	0.65*	0.84*	0.26	0.63*	0.42	0.25	0.72*	0.84*	0.14	0.69*	0.84*	0.91*	0.08	0.4	0.86*	0.11	0.35
E3 (in vivo)	3	44 (BM11)	0.63	0.54	0	0.39	0.54	0.58	0.71*	0.42	0.28	0.63	0.59	0.29	0.78*	0	0.81*	0.52	0	0.51
		45 (BM19)	0.94*	0.83*	0	0.94*	0.85*	0.84*	0.9*	0.6	0.91*	0.95*	0.69	0.87*	0.9*	0	0.74*	0.86*	0	0.43
		46 (BM23)	0.47	0.19	0	0.43	0.21	0.25	0.73*	0	0.5	0.74*	0	0.23	0.86*	NA	0.23	0.71*	NA	0.27
		47 (BM24)	0.56	0.71*	0	0.24	0.15	0.54	0.78*	0.68*	0.47	0.57	0.74*	0.4	0.65*	NA	0.42	0.6	NA	0.55
		48 (BM28)	0.84*	0.83*	0	0.67*	0.77*	0.55	0	0.74*	0.51	0	0.83*	0.28	0	NA	0.64*	0.03	NA	0.64*
E4 (in vitro)	5	49 (BM19 - 1.5%)	0.32	0.73	0.1	0.32	0.73	0.1	0	0	0	0	0	0	0.69	0.66	0	0.34	0.66	0
		50 (BM19 - 2.0%)	0.58	0.54	0.18	0.6	0.54	0	0.8	0	0.66	0.8	0	0.66	0.82	0.38	0.4	0.97*	0.38	0.4
		51 (BM19 - 2.5%)	0	0.95*	0.74	0	0.95*	0.46	0	0.74	0.85*	0	0.74	0.85	0.81	0.78	0.94*	0.94*	0.78	0.94*
		52 (BM19 - 3.0%)	0.3	0.95*	0.92*	0.46	0.95*	0.81	0.82	0.64	0.95*	0.82	0.64	0.95	0.84*	0.33	0.71	0.92*	0.33	0.71
		53 (BM23 - 1.5%)	0.73	0.13	0.8	0.81	0.13	0.84*	NA	NA	NA	NA	NA	NA	0.69	0	0	0.7	0	0
		54 (BM23 - 2.0%)	0.73	0	0.92*	0.73	0	0.96*	0	0	0.3	0	0	0.3	0.92*	0	NA	0.66	0	NA
		55 (BM23 - 2.5%)	0.62	0.29	0.94*	0.48	0.29	0.67	0	0.57	0.96*	0	0.57	0.96	0.9*	0	0	0.81	0	0
		56 (BM23 - 3.0%)	0	0.89*	0.74	0	0.89*	0.7	0.17	0	0.4	0.17	0	0.4	0.53	0.6	0.6	0.88*	0.38	0.6
E5 (in vitro)	7	57 (D0, BM19, 2,4D - 0)	NA	NA	NA	NA	NA	NA	NA	0	NA*	NA	0	1*	NA	NA	NA*	NA*	NA	NA
		58 (D1, BM19, 2,4D - 0.01)	0	0	0.5	0	0	0.5	0.8*	0.71	0.83*	0.9*	0.64	0.77*	0.92*	NA	0*	0.65	NA	0
		59 (D2, BM19, 2,4D - 0.05)	0.97*	0.78*	0	0.95*	0.63	0.46	0.83*	0.8*	0.8*	0.84*	0.26	0.55	0.92*	0.29	0	0.72	0.29	0
		60 (D3BM19, 2,4D - 0.1)	0.36	0.06	0.5*	0.51	0.16	0	0	0	NA	0	0	NA	0.6	0	0	0.24	0	0
		61 (D4, BM19, 2,4D - 0.5)	0	0	0.5*	0.34	0.82*	0.42	NA	NA	NA	NA	NA	NA	NA	NA	NA	NA	NA	NA
		62 (N1, BM19, NAA - 0.1)	0.8*	0.5*	0.5*	0.55	0	0.95*	0.76*	0.51	NA	0.84*	0.18	NA	0.95*	0.07	NA	0.82*	0.07	0.8*
		63 (N2, BM19, NAA - 0.5)	0.43	0.5*	0.5*	0.47	0.79*	0.83*	0.29	0	NA	0.03	0	NA	0.83	0.08	0	0.83*	0.15	0
		64 (N3, BM19, NAA - 1)	0.3	0.59*	0.59*	0.66	0.73	0	0.29	NA	NA	0.36	NA	NA	0.77	0	0	0.44	0	0
		65 (N4, BM19, NAA - 2)	0.55	0	0.59*	0.38	0.07	0.11	0.79	0	NA	0.97*	0	NA	0.55*	0.4	0	0.84*	0.09	0
		66 (D0, BM23, 2,4D - 0)	NA	NA	NA	NA	NA	NA	0	NA	0	0	NA	0	0	NA	NA	0	NA	NA
		67 (D1, BM23, 2,4D - 0.01)	NA	0	0.32	NA	0	0.22	0	0.61	0.27	0	0.4	0.79*	0.63	0	NA	0.63	0	NA
		68 (D2, BM23, 2,4D - 0.05)	0.71	0.88*	0	0.73*	0.7	0.4	0	0.73	0	0	0.98*	0	0.59	0	0	0.83*	0	0
		69 (D3, BM23, 2,4D - 0.1)	0.9*	0.92*	0.5*	0.82*	0.59	0.01	0.66	0.29	0	0.34	0.69	0	0.5	0.71	NA	0.75*	0.66	NA
		70 (D4, BM23, 2,4D - 0.5)	0	0.5*	0.5*	0.12	0.25	0.71	NA	NA	NA	NA	NA	NA	0	NA	NA	0	NA	NA
		71 (N1, BM23, NAA - 0.1)	0.17	0.5*	0.5*	0.68	0.75*	0.23	0.92*	0	NA	0.32	0	NA	0.67	0.44	0.33	0.66	0.64	0.33
		72 (N2, BM23, NAA - 0.5)	0.39	0.5*	0.5*	0.83*	0.55	0	0.86*	0	0	0.39	0	0	0.92*	0	0	0.74*	0	0
		73 (N3, BM23, NAA - 1)	0	0	0.5*	0.79*	0.55	0.07	0.6	NA	0	0.33	NA	0	0	0.35	NA	0.96*	0.43	NA
		74 (N4, BM23, NAA - 2)	0.36	0	0	0.66	0.12	0	0.4	0.36	0	0	0.23	0	0.36	0.46	NA	0.25	0.38	NA
E5 (in vivo)	6	75 (D0, BM19, 2,4D - 0)	0	0.27	0.74*	0	0.27	0.66*	NA	0.32	0.63*	NA	0.55*	0.51*	NA	NA	NA	NA	NA	NA
		76 (D1, BM19, 2,4D - 0.01)	0.07	0.66*	0.7*	0.07	0.66*	0.7*	0.53*	0.62*	0.27	0.27	0.73*	0.38	0	0	0.22	0	0	0.08
		77 (D2, BM19, 2,4D - 0.05)	0.37	0.8*	0.23	0.22	0.74*	0.69*	0.67*	0.76*	0.32	0.29	0.56*	0.47*	0	0	0.06	0	0	0.01
		78 (D3, BM19, 2,4D - 0.1)	0.69*	0.77*	0.76*	0.41	0.82*	0.88*	0.85*	0.33	0.37	0.63*	0.51*	0.59*	0	0	NA	0	0	NA
		79 (D4, BM19, 2,4D - 0.5)	0.64*	0.58*	0.6*	0.66*	0.73*	0.76*	0	0.7*	0.96*	0	0.72*	0.85*	0	NA	NA	0	NA	NA
		80 (N1, BM19, NAA - 0.1)	0.42	0.4	0.51*	0.42	0.63*	0.67*	0.5*	0.6*	0.44*	0.25	0.71*	0.72*	0.27	0	0.3	0.3	0.01	0.58*
		81 (N2, BM19, NAA - 0.5)	0.54*	0.31	0.36	0.62*	0.57*	0.37	0	0.31	0	0	0.39	0	0.59*	0.27	0.36	0.75*	0.29	0.35
		82 (N3, BM19, NAA - 1)	0.52	0	0.26	0.38	0.35	0.5*	0.49*	0.4	0.29	0.24	0.39	0.05	0.39	0	0.3	0.42	0	0.43
		83 (N4, BM19, NAA - 2)	0.47	0.51*	0.41	0.58*	0.24	0.45*	0.37	0.27	0.08	0.41	0.54*	0	0.32	0	0.55*	0.5	0	0.56*
E6 (in vivo)	8	84 (DB1, BM19, 2,4D - 0.01/BAP - 0.5)	0.12	0.23	0.76*	0.01	0.06	0.7*	0.44	0.41	0.84*	0.28	0.42	0.67*	NA	NA	NA	NA	NA	NA
		85 (DB2, BM19, 2,4D - 0.05/BAP - 0.5)	0.42	0.44	0.2	0.54*	0.45	0.1	0.38	0	0.64*	0.59*	0	0.69*	NA	NA	NA	NA	NA	NA
		86 (DB3, BM19, 2,4D - 0.1/BAP - 0.5)	0.48	0.75*	0.65*	0.45	0.71*	0.67*	0.53	0.68*	0.39	0.27	0.58*	0.44	NA	NA	NA	NA	NA	NA
		87 (DB4, BM19, 2,4D - 0.01/BAP - 1)	0.13	0.24	0.55	0.08	0.26	0.33	0.41	0.39	0.63*	0.21	0.1	0.5*	NA	NA	NA	NA	NA	NA
		88 (DB5, BM19, 2,4D - 0.05/BAP - 1)	0.13	0.59*	0.21	0.15	0.68*	0.19	0.1	0.61*	0.69*	0	0.7*	0.68*	NA	NA	NA	NA	NA	NA
		89 (DB6, BM19, 2,4D - 0.1/BAP - 1)	0.46	0.46	0.48	0.55*	0.46	0.19	0	0.41	0.61*	0	0.31	0.25	NA	NA	NA	NA	NA	NA
		90 (DK1, BM19, 2,4D - 0.01/KIN - 0.5)	0	0.21	0	0	0.07	0.3	0.68*	0.41	0	0.88*	0.52*	0.25	NA	NA	0	NA	NA	0
		91 (DK2, BM19, 2,4D - 0.05/KIN - 0.5)	0.63*	0.55*	0.16	0.44	0.51*	0.57*	0.61*	0.69*	0.07	0.7*	0.68*	0.2	0	NA	0	0	NA	0
		92 (DK3, BM19, 2,4D - 0.1/KIN - 0.5)	0.24	0.07	0.17	0.17	0.03	0.2	0.52	0.87*	0.66*	0.44	0.61*	0.72*	0.49*	NA	0.78*	0.49*	NA	0.78*
		93 (DK4, BM19, 2,4D - 0.01/KIN - 1)	0.37	0.24	0.36	0.2	0.23	0.52*	0.87*	0.31	0.1	0.52	0.49	0.56*	NA	NA	NA	NA	NA	NA
		94 (DK5, BM19, 2,4D - 0.05/KIN - 1)	0.52	0.4	0.12	0.51	0.41	0.22	0.62*	0.66*	0	0.75*	0.54	0	0.64*	NA	0.85*	0.64*	NA	0.85*
		95 (DK6, BM19, 2,4D - 0.1/KIN - 1)	0.41	0.17	0	0.79*	0.02	0.23	0	0.3	0.1	0.08	0.66*	0.6*	0.46	NA	0	0.46	NA	0
		96 (DP1, BM19, 2,4D - 0.01/2IP - 0.5)	0	0	0.53	0	0.01	0.49	0.77*	0.77*	0.92*	0.43	0.45	0.89*	NA	NA	NA	NA	NA	NA
		97 (DP2, BM19, 2,4D - 0.05/2IP - 0.5)	0.45	0.04	0.55*	0.49	0.15	0.52	0.91	0.92*	0.44	0.7	0.99*	0.52	0	0	0.46	0	0	0.46
		98 (DP3, BM19, 2,4D - 0.1/2IP - 0.5)	0.73*	0.29	0.2	0.51	0.55	0.25	0.12	0	0.78	0	0	0.95*	0	0	NA*	0	0	NA*
		99 (DP4, BM19, 2,4D - 0.01/2IP - 1)	0	0.21	0.64*	0	0.26	0.67*	0.88*	0.91*	0.86*	0.99*	0.98*	0.68	NA	NA	NA	NA	NA	NA
		100 (DP5, BM19, 2,4D - 0.05/2IP - 1)	0.69*	0	0.16	0.77*	0.16	0.51	0.96*	0.7	0.25	0.7	0.77	0.29	0.3	0	0	0.48	0	0
		101 (DP6, BM19, 2,4D - 0.1/2IP - 1)	0.23	0	0.54	0.32	0.39	0.66*	0	0	0	0	0	0	0.5	NA	0.63*	0.5	NA	0.63*
		102 (NB1, BM19, NAA - 0.5/BAP - 0.5)	0.63*	0.48	0.44	0.66*	0.48	0.17	0.38	0.63*	0.59*	0.41	0.78*	0.53*	0	NA	NA	0	NA	NA
		103 (NB2, BM19, NAA - 1/BAP - 0.5)	0.17	0.54*	0.53*	0.3	0.56*	0.53*	0.32	0.51*	0.64*	0.52*	0.61*	0.8*	0	NA	NA	0	NA	NA
		104 (NB3, BM19, NAA - 2/BAP - 0.5)	0.5*	0.27	0.29	0.46	0.27	0.35	0.66*	0.87*	0.68*	0.51*	0.85*	0.69*	0	NA	NA	0	NA	NA
		105 (NB4, BM19, NAA - 0.5/BAP - 1)	0.17	0.38	0.38	0.22	0.38	0.18	0.6*	0.78*	0.7*	0.73*	0.79*	0.8*	0	NA	NA	0	NA	NA
		106 (NB5, BM19, NAA - 1/BAP - 1)	0.51*	0.16	0.37	0.51*	0.16	0.47	0.52*	0.52*	0.87*	0.55*	0.7*	0.62*	NA	NA	NA	NA	NA	NA
		107 (NB6, BM19, NAA - 2/BAP - 1)	0.27	0.55*	0.27	0.27	0.55*	0.24	0.2	0.76*	0.34	0.28	0.85*	0.7*	NA	NA	NA	NA	NA	NA
		108 (NK1, BM19, NAA - 0.5/KIN - 0.5)	0.41	0.77*	0	0.2	0.82*	0.46	0.31	0.84*	0.5*	0.78*	0.75*	0.45	0.77*	NA	0	0.77*	NA	0
		109 (NK2, BM19, NAA - 1/KIN - 0.5)	0	0.71*	0.71*	0.24	0.68*	0.6*	0.21	0.73*	0.5*	0.49	0.47	0.43	0.43	NA	0.29	0.52*	NA	0.35
		110 (NK3, BM19, NAA - 2/KIN - 0.5)	0.37	0.81*	0.34	0.34	0.77*	0.51*	0	0.09	0	0	0.45	0.16	0.52*	NA	0	0.09	NA*	0
		111 (NK4, BM19, NAA - 0.5/KIN - 1)	0.66*	0.28	0.31	0.66*	0.37	0.33	0.26	0.67*	0.72*	0.65*	0.57*	0.8*	0	NA*	0	0	NA	0.01
		112 (NK5, BM19, NAA - 1/KIN - 1)	0.24	0.73*	0.57*	0.24	0.73*	0.66*	0.55	0.68*	0.52*	0.81*	0.64*	0.68*	0.47	NA	0.21	0.47	NA	0.09
		113 (NK6, BM19, NAA - 2/KIN - 1)	0.18	0.39	0.62*	0.18	0.39	0.68*	0	0.63*	0.47	0	0.68*	0.57*	0	NA	0	0	NA	0
		114 (NP1, BM19, NAA - 0.5/2IP - 0.5)	0.48	0.6*	0.55*	0.53*	0.59*	0.57*	0	0	0.19	0	0.02	0.06	0.2	0	0.7*	0.25	0	0.76*
		115 (NP2, BM19, NAA - 1/2IP - 0.5)	0.08	0.77*	0.67*	0	0.79*	0.47	0	0.34	0.46	0	0.37	0.5*	0.31	0	0.65*	0.4	0	0.48
		116 (NP3, BM19, NAA - 2/2IP - 0.5)	0.08	0.44	0.65*	0.04	0.63*	0.32	0	0.18	0	0	0.06	0	0	0	0.33	0	0	0.27
		117 (NP4, BM19, NAA - 0.5/2IP - 1)	0.35	0.63*	0	0.36	0.74*	0.31	0	0.49*	0.53*	0	0.43	0.19	0.07	0.35	0.61*	0	0.35	0.34
		118 (NP5, BM19, NAA - 1/2IP - 1)	0.21	0.46	0.51*	0.4	0.73*	0.7*	0	0.38	0.17	0	0.17	0.08	0.26	0.85*	0.27	0.16	0.85*	0.11
		119 (NP6, BM19, NAA - 2/2IP - 1)	0.31	0.83*	0.6*	0.46	0.72*	0.42	0.7*	0.15	0.63*	0.62*	0	0.16	0	0.65*	0.2	0	0.65*	0.5*
E7 (in vivo)	9	120 (M0)	0.76*	0.34	0	0.85*	0.47*	0.14	0.29	0.35	0.39	0.09	0.48	0.52*	0.69*	NA	0.63*	0.57*	NA	0.63*
		121 (M50)	0.75	0.46*	0.45*	0.72	0.58	0.43*	0.3	0.39*	0.58*	0.3	0.55*	0.71	0	NA	0	0	NA	0
		122 (M100)	0.88*	0.59*	0*	0.88*	0.54*	0	0.24*	0.67*	0.35*	0.13*	0.77*	0.62*	NA	0	0*	NA	0	0*
		123 (M200)	0.26	0.08*	0.35*	0.26	0.08*	0.45*	0	0.52	0.53	0	0.67	0.25	0	NA	0	0	NA	0
		124 (S50)	0.75	0.63	0.47	0.76	0.68	0.45	0.91	0.73*	0.55*	0.89	0.68*	0.53	0	NA	0.87	0	NA	0.87
		125 (S100)	0.41*	0.52	0.63	0.41*	0.73*	0.61	0.23	0.42	0.23*	0.15	0.45*	0.11*	0	NA	NA	0	NA	NA
		126 (S200)	NA*	0.73*	0.66	NA*	0.73*	0.72	NA	0*	0.02	NA	0*	0.07*	NA	NA	0	NA	NA	0
		127 (M100 - S100)	0	0.54*	0.65*	0	0.42*	0.72*	NA	0.6	0.82	NA	0.52	0.36	NA	NA	0	NA	NA	0
E8 (in vivo)	10	128 (Fluorescent, B0 - P0)	0	0.45	0.53	0	0.33	0.64	0	0.17	0	0	0.96*	0.76*	NA	NA	0	NA	NA	0
		129 (Fluorescent, B - 5)	0.61	0.26	0	0.5	0.16	0.12	0	0	0.46	0	0	0.47	NA	NA	NA*	NA	NA	NA*
		130 (Fluorescent, B - 25)	0	0.05	0.2	0	0.11	0.22	0	0	0	0	0	0.71*	NA	NA	NA	NA	NA	NA
		131 (Fluorescent, B - 50)	0	0.1	0	0.14	0	0	NA	0	0.48	NA	0	0	NA	NA	0	NA	NA	0
		132 (Fluorescent, P - 0.5)	0.34	0.2	0	0.55	0.51	0	0	0.04	0	0	0	0.63	NA	NA	0	NA	NA	0
		133 (Fluorescent, P - 1)	0.63	0.13	0	0.76*	0.2	0	NA	NA*	0.42	NA	NA*	0.45	NA	NA	0.63	NA	NA	0.63
		134 (Fluorescent, P - 2)	0.21	0	0	0.1	0	0	NA	0	0.15	NA	0	0.03	NA	NA	NA	NA	NA	NA
		135 (LED, B0 - P0)	0.62	0.07	0	0.64	0	0	0	NA*	0.73	0	0.44	0.2	NA	NA	0	NA	NA	0
		136 (LED, B - 5)	0.32	0.18	0	0.32	0.61	0.36	NA	NA*	0.5	NA	NA*	0.12	NA	NA	0	NA	NA	0
		137 (LED, B - 25)	0.24	0.1	0.21	0.45	0.3	0.18	NA	NA	0	NA	NA	0	NA	NA	NA	NA	NA	NA
		138 (LED, B - 50)	0	0	0.37	0	0	0.13	NA	NA*	0	NA	NA*	0	NA	NA	NA	NA	NA	NA
		139 (LED, P - 0.5)	0.51	0	0	0.51	0	0.2	NA	NA*	0.82*	NA	NA*	0.63	NA	NA	0.36	NA	NA	0.7*
		140 (LED, P - 1)	0.71*	0.74*	0	0.63	0.73*	0	NA	0	0	NA	0	0	NA	NA	0	NA	NA	0
		141 (LED, P - 2)	0.61	0.45	0.33	0.61	0.45	0.26	NA	NA	0	NA	NA	0	NA	NA	0	NA	NA	0
E9 (in vivo)	11	142 (LA0)	0	0.65*	0	0	0.47	0	0	0.18	0	0	0.36	0.46	NA	NA	0.17	NA	NA	0.17
		143 (LA5)	0	0.2	0.63*	0	0.45	0.33*	0	0*	0	0.03	0.08*	0.2	NA	NA	0.13*	NA	NA	0.13*
		144 (LA10)	0	0.4	0*	0	0.27	0.4	0	0.37	0	0	0.33	0.14	NA	NA	0.45	NA	NA	0.45
		145 (LA50)	0	0.06	0.15*	0	0.07	0.37*	0	0.45	0	0	0.83	0	NA	NA	0	NA	NA	0
		146 (LA100)	0.3	0	0.56	0.3	0	0.5	0	NA	0.1	0	0.74	0.32	NA	NA	0.61	NA	NA	0.61
		147 (LA250)	0	0	0.6	0	0	0.5	NA	NA	0.21	NA	NA*	0	NA	NA	0	NA	NA	0
		148 (LA500)	NA	0	0.89*	NA	0	0.89*	NA	NA	0	NA	NA	0	NA	NA	NA	NA	NA	NA
E10 (in vivo)	12	149 (AC0)	0.4	0.45	0.09	0.44	0.44	0.42	0	0.77	0.1	0	0.69	0.45	NA	NA	0.84*	NA	NA	0.84*
		150 (AC0.1)	0.26	0.19	0.1	0.26	0.21	0.39	0.11	0.02	0	0.11	0	0.02	NA	NA	NA	NA	NA	NA
		151 (AC0.5)	0	0.79*	0	0	0.68*	0.33	NA	NA	0.08	NA	NA	0.54*	NA	NA	NA	NA	NA	NA
		152 (AC1.5)	0.02	0.3	0	0	0.29	0	NA	NA	0.07	NA	NA	0	NA	NA	NA	NA	NA	NA
		153 (VC50)	0	0.41	0.09	0	0.47	0	0.42	0	0.05	0.38	0.05	0.33	NA	NA	0	NA	NA	0
		154 (VC100)	0	0	0.26	0	0	0.28	0	0.34	0.12	0	0.91*	0.4	NA	NA	0	NA	NA	0
		155 (VC200)	0	0.75*	0	0	0.75*	0	0.71*	0.84	0.09	0.59*	0.86	0.04	NA	NA	NA	NA	NA	NA
E11 (in vivo)	13	156 (SN0)	0	0.03	0	0	0.03	0.48	0	0.15	0	0.18	0.95*	0.04	NA	NA	0	NA	NA	0
		157 (SN0.1)	0	0.34	0	0	0.43	0.1	0	0.15	0.22	0.02	0.88	0.3	NA	NA	0	NA	NA	0
		158 (SN0.5)	0	0.31	0	0	0.35	0.21	0	0.39	0	0	0.86	0	NA	NA	0	NA	NA	0
		159 (SN1)	0	0.03	0.15	0	0.03	0.54*	NA	0.39	0.09	NA	0.57	0.76*	NA	NA	0.85*	NA	NA	0.85*
		160 (SN2)	0	0	0.23	0	0	0.07	NA	0.59	0.19	NA	0.47	0.61*	NA	NA	0	NA	NA	0
		161 (SN3)	0	0.56	0	0	0.56	0.17	NA	0.76	0.44	NA	0.89	0.85*	NA	NA	0.15	NA	NA	0.15
		162 (SN5)	0	0.09	0	0	0.48	0.19	NA*	0	0.45	NA*	0.92*	0.57	NA	NA	0	NA	NA	0
E12 (in vivo)	14	163 (W30 - FR0)	0.51	0	0	0	0.01	0.13	0.01	0.31	0.1	0.16	0.36	0.12	0.15	0.3	0.34	0	0.22	0.38
		164 (W40 - FR0)	0.73	0	0.6	0.73	0	0	0.72	0.63	0.72	0.56	0.91	0.93	0.89	0.33	0.68	0.91	0.23	0.87
		165 (W60 - FR0)	0*	0.15	0*	0*	0	0	0.63	0.55*	0.42	0.43	0.46*	0.32*	0.24	0.27	0.63	0.53*	0.27	0.26*
		166 (W70 - FR0)	0.51	0	0.6*	0.23	0.44	0	0	0	0.49	0.32	0	0.33	0.5	0	0.56*	0.74	0	0.61*
		167 (W40 - FR13.24)	0.72*	0.28	0.6*	0.75*	0	0.65	0.63*	0.9	0.67*	0.61	0.85*	0.82*	0.39*	0.34	0.49*	0.81*	0.24	0.71*
		168 (W50 - FR13.24)	0.76	0	0*	0	0	0.13	0.85	0	0.67	0.58	0.39	0.65	0.16	0.23	0.24	0.3*	0.23	0.47
		169 (W65 - FR13.24)	0.19*	0.71	0.59	0.32	0.45	0.24	0.24*	0	0.55	0.69	0.15	0.67	0.02	0	0.76	0.31	0	0.78
		170 (W80 - FR13.24)	0.18	0.25	0.6*	0.45	0.24	0	0.07	0	0.16	0.09	0.42	0.46	0.63	0	0.34	0.87*	0	0.66*
	NOTES
	Asterisk indicates p-val<0.05
	NA=No data
	No heritability estimates is listed in E2 as only 2 genotypes were tested
	BM= Basal medium
	indirect= Indirect shoot regeneration
	direct= Direct shoot regeneration
	BM19 - 1.5%= Basal medium19 - 1.5% sucrose
	BM19 - 2.0%= Basal medium19 - 2.0% sucrose
	BM19 - 2.5%= Basal medium19 - 2.5% sucrose
	BM19 - 3.0%= Basal medium19 - 3.0% sucrose
	BM23 - 1.5%= Basal medium23 - 1.5% sucrose
	BM23 - 2.0%= Basal medium23 - 2.0% sucrose
	BM23 - 2.5%= Basal medium23 - 2.5% sucrose
	BM23 - 3.0%= Basal medium23 - 3.0% sucrose
	D0, BM19, 2,4D - 0= basal medium19, 2,4-D 0.0mg/L
	D1, BM19, 2,4D - 0.01= basal medium19, 2,4-D 0.01mg/L
	D2, BM19, 2,4D - 0.05= basal medium19, 2,4-D 0.05mg/L
	D3, BM19, 2,4D - 0.1= basal medium19, 2,4-D 0.1mg/L
	D4, BM19, 2,4D - 0.5= basal medium19, 2,4-D 0.5mg/L
	N1, BM19, NAA - 0.1= basal medium19, NAA 0.1mg/L
	N2, BM19, NAA - 0.5= basal medium19, NAA 0.5mg/L
	N3, BM19, NAA - 1= basal medium19, NAA 1mg/L
	N4, BM19, NAA - 2= basal medium19, NAA 2mg/L
	D0, BM23, 2,4D - 0= basal medium23, 2,4-D 0.0mg/L
	D1, BM23, 2,4D - 0.01= basal medium23, 2,4-D 0.01 mg/L
	D2, BM23, 2,4D - 0.05= basal medium23, 2,4-D 0.05 mg/L
	D3, BM23, 2,4D - 0.1= basal medium23, 2,4-D 0.1mg/L
	D4, BM23, 2,4D - 0.5= basal medium23, 2,4-D 0.5mg/L
	N1, BM23, NAA - 0.1= basal medium23, NAA 0.1mg/L
	N2, BM23, NAA - 0.5= basal medium23, NAA 0.5mg/L
	N3, BM23, NAA - 1= basal medium23, NAA 1mg/L
	N4, BM23, NAA - 2= basal medium23, NAA 2mg/L
	DB1, BM19, 2,4D- 0.01/BAP - 0.5= basal medium19, 2,4-D 0.01mg/L, BAP 0.5mg/L
	DB2, BM19, 2,4D - 0.05/BAP - 0.5= basal medium19, 2,4-D 0.05mg/L, BAP 0.5mg/L
	DB3, BM19, 2,4D - 0.1/BAP - 0.5= basal medium19, 2,4-D 0.1mg/L, BAP 0.5mg/L
	DB4, BM19, 2,4D - 0.01/BAP - 1= basal medium19, 2,4-D 0.01mg/L, BAP 1mg/L
	DB5, BM19, 2,4D - 0.05/BAP - 1= basal medium19, 2,4-D 0.05mg/L, BAP 1mg/L
	DB6, BM19, 2,4D - 0.1/BAP - 1= basal medium19, 2,4-D 0.1mg/L, BAP 1mg/L
	DK1, BM19, 2,4D - 0.01/KIN - 0.5= basal medium19, 2,4-D 0.01mg/L, KIN 0.5mg/L
	DK2, BM19, 2,4D - 0.05/KIN - 0.5= basal medium19, 2,4-D 0.05mg/L, KIN 0.5mg/L
	DK3, BM19, 2,4D - 0.1/KIN - 0.5 = basal medium19, 2,4-D 0.1mg/L, KIN 0.5mg/L
	DK4, BM19, 2,4D - 0.01/KIN - 1= basal medium19, 2,4-D 0.01mg/L, KIN 1mg/L
	DK5, BM19, 2,4D - 0.05/KIN - 1= basal medium19, 2,4-D 0.05mg/L, KIN 1mg/L
	DK6, BM19, 2,4D - 0.1/KIN - 1= basal medium19, 2,4-D 0.1mg/L, KIN 1mg/L
	DP1, BM19, 2,4D - 0.01/2IP - 0.5= basal medium19, 2,4-D 0.01mg/L, 2IP 0.5mg/L
	DP2, BM19, 2,4D - 0.05/2IP - 0.5= basal medium19, 2,4-D 0.05mg/L, 2IP 0.5mg/L
	DP3, BM19, 2,4D - 0.1/2IP - 0.5= basal medium19, 2,4-D 0.1mg/L, 2IP 0.5mg/L
	DP4, BM19, 2,4D - 0.01/2IP - 1= basal medium19, 2,4-D 0.01mg/L, 2IP 1mg/L
	DP5, BM19, 2,4D - 0.05/2IP - 1= basal medium19, 2,4-D 0.05mg/L, 2IP 1mg/L
	DP6, BM19, 2,4D - 0.1/2IP - 1= basal medium19, 2,4-D 0.1mg/L, 2IP 1mg/L
	NB1, BM19, NAA - 0.5/BAP - 0.5= basal medium19, NAA 0.5mg/L, BAP 0.5mg/L
	NB2, BM19, NAA - 1/BAP - 0.5= basal medium19, NAA 1mg/L, BAP 0.5mg/L
	NB3, BM19, NAA - 2/BAP - 0.5= basal medium19, NAA 2mg/L, BAP 0.5mg/L
	NB4, BM19, NAA - 0.5/BAP - 1= basal medium19, NAA 0.5mg/L, BAP 1mg/L
	NB5, BM19, NAA - 1/BAP - 1= basal medium19, NAA 1mg/L, BAP 1mg/L
	NB6, BM19, NAA - 2/BAP - 1= basal medium19, NAA 2mg/L, BAP 1mg/L
	NK1, BM19, NAA - 0.5/KIN - 0.5= basal medium19, NAA 0.5mg/L, KIN 0.5mg/L
	NK2, BM19, NAA - 1/KIN - 0.5= basal medium19, NAA 1mg/L, KIN 0.5mg/L
	NK3, BM19, NAA - 2/KIN - 0.5= basal medium19, NAA 2mg/L, KIN 0.5mg/L
	NK4, BM19, NAA - 0.5/KIN - 1= basal medium19, NAA 0.5mg/L, KIN 1mg/L
	NK5, BM19, NAA - 1/KIN - 1= basal medium19, NAA 1mg/L, KIN 1mg/L
	NK6, BM19, NAA - 2/KIN - 1= basal medium19, NAA 2mg/L, KIN 1mg/L
	NP1, BM19, NAA - 0.5/2IP - 0.5= basal medium19, NAA 0.5mg/L, 2IP 0.5mg/L
	NP2, BM19, NAA - 1/2IP - 0.5= basal medium19, NAA 1mg/L, 2IP 0.5mg/L
	NP3, BM19, NAA - 2/2IP - 0.5= basal medium19, NAA 2mg/L, 2IP 0.5mg/L
	NP4, BM19, NAA - 0.5/2IP - 1= basal medium19, NAA 0.5mg/L, 2IP 1mg/L
	NP5, BM19, NAA - 1/2IP - 1= basal medium19, NAA 1mg/L, 2IP 1mg/L
	NP6, BM19, NAA - 2/2IP - 1= basal medium19, NAA 2mg/L, 2IP 1mg/L
	M0= Melatonin 0µM
	M50= Melatonin 50µM
	M100= Melatonin 100µM
	M200= Melatonin 200µM
	S50= Serotonin 50µM
	S100= Serotonin 100µM
	S200= Serotonin 200µM
	M100 - S100= Melatonin 100µM - Serotonin 100µM
	Fluorescent, B0 - P0= benomyl 0mg/L - PPM 0ml/L
	Fluorescent, B - 5= benomyl 5mg/L
	Fluorescent, B - 25= benomyl 25mg/L
	Fluorescent, B - 50= benomyl 50mg/L
	Fluorescent, P - 0.5= PPM 0.5ml/L
	Fluorescent, P - 1= PPM 1ml/L
	Fluorescent, P - 2= PPM 2ml/L
	LED, B0 - P0= benomyl 0mg/L - PPM 0ml/L
	LED, B - 5= benomyl 5mg/L
	LED, B - 25= benomyl 25mg/L
	LED, B - 50= benomyl 50mg/L
	LED, P - 0.5= PPM 0.5ml/L
	LED, P - 1= PPM 1ml/L
	LED, P - 2= PPM 2ml/L
	LA0= Lipoic acid 0µM
	LA5= Lipoic acid 5µM
	LA10= Lipoic acid 10µM
	LA50= Lipoic acid 50µM
	LA100= Lipoic acid 100µM
	LA250= Lipoic acid 250µM
	LA500= Lipoic acid 500µM
	AC0= Activated charcoal 0g/L
	AC0.1= Activated charcoal 0.1g/L
	AC0.5= Activated charcoal 0.5g/L
	AC1.5= Activated charcoal 1.5g/L
	VC50= Ascorbic acid 50mg/L
	VC100= Ascorbic acid 100mg/L
	VC200= Ascorbic acid 200mg/L
	SN0= Siver nitrate 0mg/L
	SN0.1= Siver nitrate 0.1mg/L
	SN0.5= Siver nitrate 0.5mg/L
	SN1= Siver nitrate 1mg/L
	SN2= Siver nitrate 2mg/L
	SN3= Siver nitrate 3mg/L
	SN5= Siver nitrate 5mg/L
	W30 - FR0= White light 30µmol m-2 s-1 - Far red 0µmol m-2 s-1
	W40 - FR0= White light 40µmol m-2 s-1 - Far red 0µmol m-2 s-1
	W60 - FR0= White light 60µmol m-2 s-1 - Far red 0µmol m-2 s-1
	W70 - FR0= White light 70µmol m-2 s-1 - Far red 0µmol m-2 s-1
	W40 - FR13.24= White light 40µmol m-2 s-1 - Far red 13.24µmol m-2 s-1
	W50 - FR13.24= White light 50µmol m-2 s-1 - Far red 13.24µmol m-2 s-1
	W65 - FR13.24= White light 65µmol m-2 s-1 - Far red 13.24µmol m-2 s-1
	W80 - FR13.24= White light 80µmol m-2 s-1 - Far red 13.24µmol m-2 s-1

## Sheet: Sheet2
Table S3. Broad-sense heritabilities from different experimental conditions displayed as a heat map.
Experiment ID	Working ID	Treatment	Proportion of explants with callus			Callus size			Proportion of explants with shoot			Shoot number			Proportion of explants with root			Root number
			Leaf	Petiole	Stem	Leaf	Petiole	Stem	Leaf	Petiole	Stem	Leaf	Petiole	Stem	Leaf	Petiole	Stem	Leaf	Petiole	Stem
E1 (in vivo)	1	1 (indirect)	0.8	0.87					0.63	0.7					0.74	0.52
		2 (direct)	0.41	0.69					0.63	0.82					NA	NA
E3 (in vitro)	4	39 (BM11)	0.37	0.26	0.43	0.36	0.25	0.6	0.78	0.46	0.85	0.33	0.57	0.79	0.74	0.04	0.61	0.78	0.05	0.34
		40 (BM19)	0.02	0.66	0.72	0.06	0.6	0.73	0.49	0.78	0.38	0.4	0.63	0.66	0.96	0.81	0.12	0.75	0.74	0.12
		41 (BM23)	0	0.74	0.6	0	0.73	0.51	0.23	0.49	0.56	0.01	0.24	0.47	0.56	0.31	0.76	0.62	0.25	0.72
		42 (BM24)	0.49	0.84	0.66	0.45	0.84	0.63	0.72	0.88	0.82	0.23	0.71	0.46	0.56	0.29	0.4	0.68	0.29	0.29
		43 (BM28)	0.27	0.65	0.84	0.26	0.63	0.42	0.25	0.72	0.84	0.14	0.69	0.84	0.91	0.08	0.4	0.86	0.11	0.35
E3 (in vivo)	3	44 (BM11)	0.63	0.54	0	0.39	0.54	0.58	0.71	0.42	0.28	0.63	0.59	0.29	0.78	0	0.81	0.52	0	0.51
		45 (BM19)	0.94	0.83	0	0.94	0.85	0.84	0.9	0.6	0.91	0.95	0.69	0.87	0.9	0	0.74	0.86	0	0.43
		46 (BM23)	0.47	0.19	0	0.43	0.21	0.25	0.73	0	0.5	0.74	0	0.23	0.86	NA	0.23	0.71	NA	0.27
		47 (BM24)	0.56	0.71	0	0.24	0.15	0.54	0.78	0.68	0.47	0.57	0.74	0.4	0.65	NA	0.42	0.6	NA	0.55
		48 (BM28)	0.84	0.83	0	0.67	0.77	0.55	0	0.74	0.51	0	0.83	0.28	0	NA	0.64	0.03	NA	0.64
E4 (in vitro)	5	49 (BM19 - 1.5%)	0.32	0.73	0.1	0.32	0.73	0.1	0	0	0	0	0	0	0.69	0.66	0	0.34	0.66	0
		50 (BM19 - 2.0%)	0.58	0.54	0.18	0.6	0.54	0	0.8	0	0.66	0.8	0	0.66	0.82	0.38	0.4	0.97	0.38	0.4
		51 (BM19 - 2.5%)	0	0.95	0.74	0	0.95	0.46	0	0.74	0.85	0	0.74	0.85	0.81	0.78	0.94	0.94	0.78	0.94
		52 (BM19 - 3.0%)	0.3	0.95	0.92	0.46	0.95	0.81	0.82	0.64	0.95	0.82	0.64	0.95	0.84	0.33	0.71	0.92	0.33	0.71
		53 (BM23 - 1.5%)	0.73	0.13	0.8	0.81	0.13	0.84	NA	NA	NA	NA	NA	NA	0.69	0	0	0.7	0	0
		54 (BM23 - 2.0%)	0.73	0	0.92	0.73	0	0.96	0	0	0.3	0	0	0.3	0.92	0	NA	0.66	0	NA
		55 (BM23 - 2.5%)	0.62	0.29	0.94	0.48	0.29	0.67	0	0.57	0.96	0	0.57	0.96	0.9	0	0	0.81	0	0
		56 (BM23 - 3.0%)	0	0.89	0.74	0	0.89	0.7	0.17	0	0.4	0.17	0	0.4	0.53	0.6	0.6	0.88	0.38	0.6
E5 (in vitro)	7	57 (D0, BM19, 2,4D - 0)	NA	NA	NA	NA	NA	NA	NA	0	NA	NA	0	1	NA	NA	NA	NA	NA	NA
		58 (D1, BM19, 2,4D - 0.01)	0	0	0.5	0	0	0.5	0.8	0.71	0.83	0.9	0.64	0.77	0.92	NA	0	0.65	NA	0
		59 (D2, BM19, 2,4D - 0.05)	0.97	0.78	0	0.95	0.63	0.46	0.83	0.8	0.8	0.84	0.26	0.55	0.92	0.29	0	0.72	0.29	0
		60 (D3BM19, 2,4D - 0.1)	0.36	0.06	0.5	0.51	0.16	0	0	0	NA	0	0	NA	0.6	0	0	0.24	0	0
		61 (D4, BM19, 2,4D - 0.5)	0	0	0.5	0.34	0.82	0.42	NA	NA	NA	NA	NA	NA	NA	NA	NA	NA	NA	NA
		62 (N1, BM19, NAA - 0.1)	0.8	0.5	0.5	0.55	0	0.95	0.76	0.51	NA	0.84	0.18	NA	0.95	0.07	NA	0.82	0.07	0.8
		63 (N2, BM19, NAA - 0.5)	0.43	0.5	0.5	0.47	0.79	0.83	0.29	0	NA	0.03	0	NA	0.83	0.08	0	0.83	0.15	0
		64 (N3, BM19, NAA - 1)	0.3	0.59	0.59	0.66	0.73	0	0.29	NA	NA	0.36	NA	NA	0.77	0	0	0.44	0	0
		65 (N4, BM19, NAA - 2)	0.55	0	0.59	0.38	0.07	0.11	0.79	0	NA	0.97	0	NA	0.55	0.4	0	0.84	0.09	0
		66 (D0, BM23, 2,4D - 0)	NA	NA	NA	NA	NA	NA	0	NA	0	0	NA	0	0	NA	NA	0	NA	NA
		67 (D1, BM23, 2,4D - 0.01)	NA	0	0.32	NA	0	0.22	0	0.61	0.27	0	0.4	0.79	0.63	0	NA	0.63	0	NA
		68 (D2, BM23, 2,4D - 0.05)	0.71	0.88	0	0.73	0.7	0.4	0	0.73	0	0	0.98	0	0.59	0	0	0.83	0	0
		69 (D3, BM23, 2,4D - 0.1)	0.9	0.92	0.5	0.82	0.59	0.01	0.66	0.29	0	0.34	0.69	0	0.5	0.71	NA	0.75	0.66	NA
		70 (D4, BM23, 2,4D - 0.5)	0	0.5	0.5	0.12	0.25	0.71	NA	NA	NA	NA	NA	NA	0	NA	NA	0	NA	NA
		71 (N1, BM23, NAA - 0.1)	0.17	0.5	0.5	0.68	0.75	0.23	0.92	0	NA	0.32	0	NA	0.67	0.44	0.33	0.66	0.64	0.33
		72 (N2, BM23, NAA - 0.5)	0.39	0.5	0.5	0.83	0.55	0	0.86	0	0	0.39	0	0	0.92	0	0	0.74	0	0
		73 (N3, BM23, NAA - 1)	0	0	0.5	0.79	0.55	0.07	0.6	NA	0	0.33	NA	0	0	0.35	NA	0.96	0.43	NA
		74 (N4, BM23, NAA - 2)	0.36	0	0	0.66	0.12	0	0.4	0.36	0	0	0.23	0	0.36	0.46	NA	0.25	0.38	NA
E5 (in vivo)	6	75 (D0, BM19, 2,4D - 0)	0	0.27	0.74	0	0.27	0.66	NA	0.32	0.63	NA	0.55	0.51	NA	NA	NA	NA	NA	NA
		76 (D1, BM19, 2,4D - 0.01)	0.07	0.66	0.7	0.07	0.66	0.7	0.53	0.62	0.27	0.27	0.73	0.38	0	0	0.22	0	0	0.08
		77 (D2, BM19, 2,4D - 0.05)	0.37	0.8	0.23	0.22	0.74	0.69	0.67	0.76	0.32	0.29	0.56	0.47	0	0	0.06	0	0	0.01
		78 (D3, BM19, 2,4D - 0.1)	0.69	0.77	0.76	0.41	0.82	0.88	0.85	0.33	0.37	0.63	0.51	0.59	0	0	NA	0	0	NA
		79 (D4, BM19, 2,4D - 0.5)	0.64	0.58	0.6	0.66	0.73	0.76	0	0.7	0.96	0	0.72	0.85	0	NA	NA	0	NA	NA
		80 (N1, BM19, NAA - 0.1)	0.42	0.4	0.51	0.42	0.63	0.67	0.5	0.6	0.44	0.25	0.71	0.72	0.27	0	0.3	0.3	0.01	0.58
		81 (N2, BM19, NAA - 0.5)	0.54	0.31	0.36	0.62	0.57	0.37	0	0.31	0	0	0.39	0	0.59	0.27	0.36	0.75	0.29	0.35
		82 (N3, BM19, NAA - 1)	0.52	0	0.26	0.38	0.35	0.5	0.49	0.4	0.29	0.24	0.39	0.05	0.39	0	0.3	0.42	0	0.43
		83 (N4, BM19, NAA - 2)	0.47	0.51	0.41	0.58	0.24	0.45	0.37	0.27	0.08	0.41	0.54	0	0.32	0	0.55	0.5	0	0.56
E6 (in vivo)	8	84 (DB1, BM19, 2,4D - 0.01/BAP - 0.5)	0.12	0.23	0.76	0.01	0.06	0.7	0.44	0.41	0.84	0.28	0.42	0.67	NA	NA	NA	NA	NA	NA
		85 (DB2, BM19, 2,4D - 0.05/BAP - 0.5)	0.42	0.44	0.2	0.54	0.45	0.1	0.38	0	0.64	0.59	0	0.69	NA	NA	NA	NA	NA	NA
		86 (DB3, BM19, 2,4D - 0.1/BAP - 0.5)	0.48	0.75	0.65	0.45	0.71	0.67	0.53	0.68	0.39	0.27	0.58	0.44	NA	NA	NA	NA	NA	NA
		87 (DB4, BM19, 2,4D - 0.01/BAP - 1)	0.13	0.24	0.55	0.08	0.26	0.33	0.41	0.39	0.63	0.21	0.1	0.5	NA	NA	NA	NA	NA	NA
		88 (DB5, BM19, 2,4D - 0.05/BAP - 1)	0.13	0.59	0.21	0.15	0.68	0.19	0.1	0.61	0.69	0	0.7	0.68	NA	NA	NA	NA	NA	NA
		89 (DB6, BM19, 2,4D - 0.1/BAP - 1)	0.46	0.46	0.48	0.55	0.46	0.19	0	0.41	0.61	0	0.31	0.25	NA	NA	NA	NA	NA	NA
		90 (DK1, BM19, 2,4D - 0.01/KIN - 0.5)	0	0.21	0	0	0.07	0.3	0.68	0.41	0	0.88	0.52	0.25	NA	NA	0	NA	NA	0
		91 (DK2, BM19, 2,4D - 0.05/KIN - 0.5)	0.63	0.55	0.16	0.44	0.51	0.57	0.61	0.69	0.07	0.7	0.68	0.2	0	NA	0	0	NA	0
		92 (DK3, BM19, 2,4D - 0.1/KIN - 0.5)	0.24	0.07	0.17	0.17	0.03	0.2	0.52	0.87	0.66	0.44	0.61	0.72	0.49	NA	0.78	0.49	NA	0.78
		93 (DK4, BM19, 2,4D - 0.01/KIN - 1)	0.37	0.24	0.36	0.2	0.23	0.52	0.87	0.31	0.1	0.52	0.49	0.56	NA	NA	NA	NA	NA	NA
		94 (DK5, BM19, 2,4D - 0.05/KIN - 1)	0.52	0.4	0.12	0.51	0.41	0.22	0.62	0.66	0	0.75	0.54	0	0.64	NA	0.85	0.64	NA	0.85
		95 (DK6, BM19, 2,4D - 0.1/KIN - 1)	0.41	0.17	0	0.79	0.02	0.23	0	0.3	0.1	0.08	0.66	0.6	0.46	NA	0	0.46	NA	0
		96 (DP1, BM19, 2,4D - 0.01/2IP - 0.5)	0	0	0.53	0	0.01	0.49	0.77	0.77	0.92	0.43	0.45	0.89	NA	NA	NA	NA	NA	NA
		97 (DP2, BM19, 2,4D - 0.05/2IP - 0.5)	0.45	0.04	0.55	0.49	0.15	0.52	0.91	0.92	0.44	0.7	0.99	0.52	0	0	0.46	0	0	0.46
		98 (DP3, BM19, 2,4D - 0.1/2IP - 0.5)	0.73	0.29	0.2	0.51	0.55	0.25	0.12	0	0.78	0	0	0.95	0	0	NA	0	0	NA
		99 (DP4, BM19, 2,4D - 0.01/2IP - 1)	0	0.21	0.64	0	0.26	0.67	0.88	0.91	0.86	0.99	0.98	0.68	NA	NA	NA	NA	NA	NA
		100 (DP5, BM19, 2,4D - 0.05/2IP - 1)	0.69	0	0.16	0.77	0.16	0.51	0.96	0.7	0.25	0.7	0.77	0.29	0.3	0	0	0.48	0	0
		101 (DP6, BM19, 2,4D - 0.1/2IP - 1)	0.23	0	0.54	0.32	0.39	0.66	0	0	0	0	0	0	0.5	NA	0.63	0.5	NA	0.63
		102 (NB1, BM19, NAA - 0.5/BAP - 0.5)	0.63	0.48	0.44	0.66	0.48	0.17	0.38	0.63	0.59	0.41	0.78	0.53	0	NA	NA	0	NA	NA
		103 (NB2, BM19, NAA - 1/BAP - 0.5)	0.17	0.54	0.53	0.3	0.56	0.53	0.32	0.51	0.64	0.52	0.61	0.8	0	NA	NA	0	NA	NA
		104 (NB3, BM19, NAA - 2/BAP - 0.5)	0.5	0.27	0.29	0.46	0.27	0.35	0.66	0.87	0.68	0.51	0.85	0.69	0	NA	NA	0	NA	NA
		105 (NB4, BM19, NAA - 0.5/BAP - 1)	0.17	0.38	0.38	0.22	0.38	0.18	0.6	0.78	0.7	0.73	0.79	0.8	0	NA	NA	0	NA	NA
		106 (NB5, BM19, NAA - 1/BAP - 1)	0.51	0.16	0.37	0.51	0.16	0.47	0.52	0.52	0.87	0.55	0.7	0.62	NA	NA	NA	NA	NA	NA
		107 (NB6, BM19, NAA - 2/BAP - 1)	0.27	0.55	0.27	0.27	0.55	0.24	0.2	0.76	0.34	0.28	0.85	0.7	NA	NA	NA	NA	NA	NA
		108 (NK1, BM19, NAA - 0.5/KIN - 0.5)	0.41	0.77	0	0.2	0.82	0.46	0.31	0.84	0.5	0.78	0.75	0.45	0.77	NA	0	0.77	NA	0
		109 (NK2, BM19, NAA - 1/KIN - 0.5)	0	0.71	0.71	0.24	0.68	0.6	0.21	0.73	0.5	0.49	0.47	0.43	0.43	NA	0.29	0.52	NA	0.35
		110 (NK3, BM19, NAA - 2/KIN - 0.5)	0.37	0.81	0.34	0.34	0.77	0.51	0	0.09	0	0	0.45	0.16	0.52	NA	0	0.09	NA	0
		111 (NK4, BM19, NAA - 0.5/KIN - 1)	0.66	0.28	0.31	0.66	0.37	0.33	0.26	0.67	0.72	0.65	0.57	0.8	0	NA	0	0	NA	0.01
		112 (NK5, BM19, NAA - 1/KIN - 1)	0.24	0.73	0.57	0.24	0.73	0.66	0.55	0.68	0.52	0.81	0.64	0.68	0.47	NA	0.21	0.47	NA	0.09
		113 (NK6, BM19, NAA - 2/KIN - 1)	0.18	0.39	0.62	0.18	0.39	0.68	0	0.63	0.47	0	0.68	0.57	0	NA	0	0	NA	0
		114 (NP1, BM19, NAA - 0.5/2IP - 0.5)	0.48	0.6	0.55	0.53	0.59	0.57	0	0	0.19	0	0.02	0.06	0.2	0	0.7	0.25	0	0.76
		115 (NP2, BM19, NAA - 1/2IP - 0.5)	0.08	0.77	0.67	0	0.79	0.47	0	0.34	0.46	0	0.37	0.5	0.31	0	0.65	0.4	0	0.48
		116 (NP3, BM19, NAA - 2/2IP - 0.5)	0.08	0.44	0.65	0.04	0.63	0.32	0	0.18	0	0	0.06	0	0	0	0.33	0	0	0.27
		117 (NP4, BM19, NAA - 0.5/2IP - 1)	0.35	0.63	0	0.36	0.74	0.31	0	0.49	0.53	0	0.43	0.19	0.07	0.35	0.61	0	0.35	0.34
		118 (NP5, BM19, NAA - 1/2IP - 1)	0.21	0.46	0.51	0.4	0.73	0.7	0	0.38	0.17	0	0.17	0.08	0.26	0.85	0.27	0.16	0.85	0.11
		119 (NP6, BM19, NAA - 2/2IP - 1)	0.31	0.83	0.6	0.46	0.72	0.42	0.7	0.15	0.63	0.62	0	0.16	0	0.65	0.2	0	0.65	0.5
E7 (in vivo)	9	120 (M0)	0.76	0.34	0	0.85	0.47	0.14	0.29	0.35	0.39	0.09	0.48	0.52	0.69	NA	0.63	0.57	NA	0.63
		121 (M50)	0.75	0.46	0.45	0.72	0.58	0.43	0.3	0.39	0.58	0.3	0.55	0.71	0	NA	0	0	NA	0
		122 (M100)	0.88	0.59	0	0.88	0.54	0	0.24	0.67	0.35	0.13	0.77	0.62	NA	0	0	NA	0	0
		123 (M200)	0.26	0.08	0.35	0.26	0.08	0.45	0	0.52	0.53	0	0.67	0.25	0	NA	0	0	NA	0
		124 (S50)	0.75	0.63	0.47	0.76	0.68	0.45	0.91	0.73	0.55	0.89	0.68	0.53	0	NA	0.87	0	NA	0.87
		125 (S100)	0.41	0.52	0.63	0.41	0.73	0.61	0.23	0.42	0.23	0.15	0.45	0.11	0	NA	NA	0	NA	NA
		126 (S200)	NA	0.73	0.66	NA	0.73	0.72	NA	0	0.02	NA	0	0.07	NA	NA	0	NA	NA	0
		127 (M100 - S100)	0	0.54	0.65	0	0.42	0.72	NA	0.6	0.82	NA	0.52	0.36	NA	NA	0	NA	NA	0
E8 (in vivo)	10	128 (Fluorescent, B0 - P0)	0	0.45	0.53	0	0.33	0.64	0	0.17	0	0	0.96	0.76	NA	NA	0	NA	NA	0
		129 (Fluorescent, B - 5)	0.61	0.26	0	0.5	0.16	0.12	0	0	0.46	0	0	0.47	NA	NA	NA	NA	NA	NA
		130 (Fluorescent, B - 25)	0	0.05	0.2	0	0.11	0.22	0	0	0	0	0	0.71	NA	NA	NA	NA	NA	NA
		131 (Fluorescent, B - 50)	0	0.1	0	0.14	0	0	NA	0	0.48	NA	0	0	NA	NA	0	NA	NA	0
		132 (Fluorescent, P - 0.5)	0.34	0.2	0	0.55	0.51	0	0	0.04	0	0	0	0.63	NA	NA	0	NA	NA	0
		133 (Fluorescent, P - 1)	0.63	0.13	0	0.76	0.2	0	NA	NA	0.42	NA	NA	0.45	NA	NA	0.63	NA	NA	0.63
		134 (Fluorescent, P - 2)	0.21	0	0	0.1	0	0	NA	0	0.15	NA	0	0.03	NA	NA	NA	NA	NA	NA
		135 (LED, B0 - P0)	0.62	0.07	0	0.64	0	0	0	NA	0.73	0	0.44	0.2	NA	NA	0	NA	NA	0
		136 (LED, B - 5)	0.32	0.18	0	0.32	0.61	0.36	NA	NA	0.5	NA	NA	0.12	NA	NA	0	NA	NA	0
		137 (LED, B - 25)	0.24	0.1	0.21	0.45	0.3	0.18	NA	NA	0	NA	NA	0	NA	NA	NA	NA	NA	NA
		138 (LED, B - 50)	0	0	0.37	0	0	0.13	NA	NA	0	NA	NA	0	NA	NA	NA	NA	NA	NA
		139 (LED, P - 0.5)	0.51	0	0	0.51	0	0.2	NA	NA	0.82	NA	NA	0.63	NA	NA	0.36	NA	NA	0.7
		140 (LED, P - 1)	0.71	0.74	0	0.63	0.73	0	NA	0	0	NA	0	0	NA	NA	0	NA	NA	0
		141 (LED, P - 2)	0.61	0.45	0.33	0.61	0.45	0.26	NA	NA	0	NA	NA	0	NA	NA	0	NA	NA	0
E9 (in vivo)	11	142 (LA0)	0	0.65	0	0	0.47	0	0	0.18	0	0	0.36	0.46	NA	NA	0.17	NA	NA	0.17
		143 (LA5)	0	0.2	0.63	0	0.45	0.33	0	0	0	0.03	0.08	0.2	NA	NA	0.13	NA	NA	0.13
		144 (LA10)	0	0.4	0	0	0.27	0.4	0	0.37	0	0	0.33	0.14	NA	NA	0.45	NA	NA	0.45
		145 (LA50)	0	0.06	0.15	0	0.07	0.37	0	0.45	0	0	0.83	0	NA	NA	0	NA	NA	0
		146 (LA100)	0.3	0	0.56	0.3	0	0.5	0	NA	0.1	0	0.74	0.32	NA	NA	0.61	NA	NA	0.61
		147 (LA250)	0	0	0.6	0	0	0.5	NA	NA	0.21	NA	NA	0	NA	NA	0	NA	NA	0
		148 (LA500)	NA	0	0.89	NA	0	0.89	NA	NA	0	NA	NA	0	NA	NA	NA	NA	NA	NA
E10 (in vivo)	12	149 (AC0)	0.4	0.45	0.09	0.44	0.44	0.42	0	0.77	0.1	0	0.69	0.45	NA	NA	0.84	NA	NA	0.84
		150 (AC0.1)	0.26	0.19	0.1	0.26	0.21	0.39	0.11	0.02	0	0.11	0	0.02	NA	NA	NA	NA	NA	NA
		151 (AC0.5)	0	0.79	0	0	0.68	0.33	NA	NA	0.08	NA	NA	0.54	NA	NA	NA	NA	NA	NA
		152 (AC1.5)	0.02	0.3	0	0	0.29	0	NA	NA	0.07	NA	NA	0	NA	NA	NA	NA	NA	NA
		153 (VC50)	0	0.41	0.09	0	0.47	0	0.42	0	0.05	0.38	0.05	0.33	NA	NA	0	NA	NA	0
		154 (VC100)	0	0	0.26	0	0	0.28	0	0.34	0.12	0	0.91	0.4	NA	NA	0	NA	NA	0
		155 (VC200)	0	0.75	0	0	0.75	0	0.71	0.84	0.09	0.59	0.86	0.04	NA	NA	NA	NA	NA	NA
E11 (in vivo)	13	156 (SN0)	0	0.03	0	0	0.03	0.48	0	0.15	0	0.18	0.95	0.04	NA	NA	0	NA	NA	0
		157 (SN0.1)	0	0.34	0	0	0.43	0.1	0	0.15	0.22	0.02	0.88	0.3	NA	NA	0	NA	NA	0
		158 (SN0.5)	0	0.31	0	0	0.35	0.21	0	0.39	0	0	0.86	0	NA	NA	0	NA	NA	0
		159 (SN1)	0	0.03	0.15	0	0.03	0.54	NA	0.39	0.09	NA	0.57	0.76	NA	NA	0.85	NA	NA	0.85
		160 (SN2)	0	0	0.23	0	0	0.07	NA	0.59	0.19	NA	0.47	0.61	NA	NA	0	NA	NA	0
		161 (SN3)	0	0.56	0	0	0.56	0.17	NA	0.76	0.44	NA	0.89	0.85	NA	NA	0.15	NA	NA	0.15
		162 (SN5)	0	0.09	0	0	0.48	0.19	NA	0	0.45	NA	0.92	0.57	NA	NA	0	NA	NA	0
E12 (in vivo)	14	163 (W30 - FR0)	0.51	0	0	0	0.01	0.13	0.01	0.31	0.1	0.16	0.36	0.12	0.15	0.3	0.34	0	0.22	0.38
		164 (W40 - FR0)	0.73	0	0.6	0.73	0	0	0.72	0.63	0.72	0.56	0.91	0.93	0.89	0.33	0.68	0.91	0.23	0.87
		165 (W60 - FR0)	0	0.15	0	0	0	0	0.63	0.55	0.42	0.43	0.46	0.32	0.24	0.27	0.63	0.53	0.27	0.26
		166 (W70 - FR0)	0.51	0	0.6	0.23	0.44	0	0	0	0.49	0.32	0	0.33	0.5	0	0.56	0.74	0	0.61
		167 (W40 - FR13.24)	0.72	0.28	0.6	0.75	0	0.65	0.63	0.9	0.67	0.61	0.85	0.82	0.39	0.34	0.49	0.81	0.24	0.71
		168 (W50 - FR13.24)	0.76	0	0	0	0	0.13	0.85	0	0.67	0.58	0.39	0.65	0.16	0.23	0.24	0.3	0.23	0.47
		169 (W65 - FR13.24)	0.19	0.71	0.59	0.32	0.45	0.24	0.24	0	0.55	0.69	0.15	0.67	0.02	0	0.76	0.31	0	0.78
		170 (W80 - FR13.24)	0.18	0.25	0.6	0.45	0.24	0	0.07	0	0.16	0.09	0.42	0.46	0.63	0	0.34	0.87	0	0.66
NOTES
Colors indicate relative values, with red the highest and green the lowest within a column (explant type).
NA=No data
No heritability estimates is listed in E2 as only 2 genotypes were tested
